# Supplementary material
Source: PubMed Central journal article supplement (PMC3234858)

## SUPPLEMENTAL DATA

### VIP36 IS A TARGET OF ECTODOMAIN SHEDDING AND REGULATES PHAGOCYTOSIS IN MACROPHAGE Raw 264.7 CELLS

Kyoko Shirakabe, Seisuke Hattori, Motoharu Seiki, Shigeo Koyasu, and Yasunori Okada

#### SUPPLEMENTAL EXPERIMENTAL PROCEDURES

##### *Construction of various VIP36 mutants and chimeras*

Cyto-Flag, -Lec, -Gly, ND, FN, LM, and SL mutants were constructed by two-step PCR. In the first step, N-terminal and C-terminal mutated fragments were amplified from wild-type VIP36 sequence using mutated primers and 5'- or 3'-primer. In the second step, mutated VIP36 were constructed from mixture of the fragments using 5'- and 3'-primers. Used mutated primers are: Cyto-Flag, tccagaaggattacaaggatgacgacgataagcggcaggagcgggaaca and tctgccgcttatcgtcgtcatccttctaataccttctggaacaccacggccc; -Lec, cctccatggaacggcatcg and cgatgccgtttccatggagg; -Gly, tcggtgatgggaacgatggctccctgtcctacgac and aggacagggagccatcgttcaccatcaccgagatgt; ND, atcagagcccagcgtcgtcacttctcaagtcgccc and gcgacttgaggaagtcgacgctgggctcgatcttg; FN, gagcccagcgtcaacaacctcaagtcgccc and aaagaca and ttgggcgacttgaggtgtgacgctgggctcgatct; LM, cccagcgtcaactcatgaagtcgccc and aaagaca and actg and gtctttgggcgacttcatgaagtgacgctgggctcga; SL, tcaacttctcaagttgccc and aaagaca and actg and acgtgtctttgggcaacttgaggaagtgacgctg. KKFF, KRFF, KKFY, and KKAA mutants were constructed by one-step PCR. Those mutants were constructed from wild-type VIP36 using 5'- primer and mutated 3'-primers listed below. KKFF, gcgatcctcagaagaacttctgttccgctcctgccgct; KRFF, gcgatcctcagaagaagcgttgttccgctcct; KKFY, gcgatcctcagtagaacttctgttccgctcctgccgct; KKAA, gcgatcctcagggccttctgttccgctcctgccgct. Chimeras were constructed by two-step PCR from both VIP36 and VIPL sequences. N-terminal VIP36 fragments and C-terminal VIPL fragments were amplified using chimera primers and 5'- or 3'-primer, and then chimeras were constructed from mixture of the fragments using 5'- and 3'-primers. Used chimera primers are: Chimera #1, ggcccctgacggggtggcggcttctcctcatcgtctttt and aaaaagacgatgaggaagagccgccaccccgtaggggccc; Chimera #2, gtcaacttctcaagtcgctgagatgacagctccaactgc and gcagtggagctgtcatctcaggcgcacttgaggaagttgac; Chimera #3, actggaccaagatcgagccctcagtggaacaatataa and ttcatattgtccactgagggctcgatcttggccag; Chimera #4, ctgatggtagcacacgccagaagaggaaaagctccatc and gatggagctttctccttctggcgtgtgctccaccatcag; Chimera #5, acgagtggagaactgcattgaagtccccggagtcgcg and cgactccgggcacttcaatgcagttcttccactcgt. In all primers, the nucleotides different from wild-type VIP36 are underlined.

*Preparation and transfection of murine bone marrow-derived macrophages*

Bone marrow was collected from the tibiae and femurs of 8-wk-old *Tace<sup>flax/flax</sup>/LysM-Cre<sup>-</sup>* mice (12). Red blood cells were removed with ACK lysing buffer, and the remaining cells were plated on tissue culture plates. Adherent cells were grown in IMDM supplemented with 20 % fetal bovine serum, 50 ng/ml recombinant human M-CSF (Peprotec), 2 mM L-Glutamine and antibiotics. At 8 days after harvesting, transfections were performed using Nucleofector<sup>TM</sup> (Lonza).

**SUPPLEMENTAL FIGURE LEGEND**

**Fig. S1. Shedding of VIP36 in bone marrow-derived macrophages.** N-terminally Myc-tagged VIP36 or VIPL was expressed in bone marrow-derived macrophages, and cell extracts (top panel) and anti-Myc immunoprecipitates from culture supernatants (bottom panel) were subjected to western blotting with an anti-Myc antibody.

Supplemental Figure S1

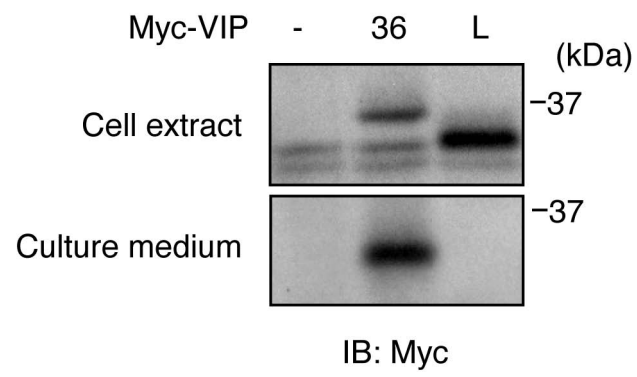

Supplement: supp_M111.275586_jbc.M111.275586-1.pdf [file supp_M111.275586_jbc.M111.275586-1.pdf]
